# Supplementary material for: Immunological Traits of Patients with Coexistent Inflammatory Bowel Disease and Periodontal Disease: A Systematic Review
Source: MDPI journal article supplement (doi:10.3390/ijerph18178958), 2021-08-25
Supplement: s1 [file s1]

**Supplementary Table S2. Quality Assessment of cross-sectional studies included (Newcastle-Ottawa scale modified by D. Zhao et al. (2018)).**

|                           | SELECTION (Max. 4*)                 |                |                              |                          | COMPARABILITY<br>(max. 2*) | OUTCOME (Max. 2*)        |                         | Total<br>starts<br>(max.<br>8*) |
|---------------------------|-------------------------------------|----------------|------------------------------|--------------------------|----------------------------|--------------------------|-------------------------|---------------------------------|
|                           | Representativeness<br>of the sample | Sample<br>size | Ascertainment<br>of exposure | Non-<br>response<br>rate |                            | Assessment of<br>outcome | Statistical<br>analysis |                                 |
| VAN DYKE,<br>1986         | *                                   |                | *                            | *                        | **                         | *                        | *                       | 7                               |
| Figueredo et<br>al., 2011 | *                                   |                | *                            | *                        | *                          | *                        | *                       | 6                               |
| Menegat et<br>al., 2016   | *                                   |                | *                            | *                        | *                          | *                        | *                       | 6                               |
| Schmidt et<br>al., 2018   | *                                   | *              | *                            | *                        | *                          | *                        | *                       | 7                               |
| Figueredo et<br>al., 2021 |                                     |                | *                            | *                        |                            |                          | *                       | 3                               |
| Figueredo et<br>al., 2017 | *                                   |                | *                            | *                        | *                          | *                        | *                       | 6                               |
