# Supplementary material for: Immunological Traits of Patients with Coexistent Inflammatory Bowel Disease and Periodontal Disease: A Systematic Review
Source: MDPI journal article supplement (doi:10.3390/ijerph18178958), 2021-08-25
Supplement: s1 [file s1]

**Supplementary Table S1 – Reasons for excluding after assessing eligibility criteria.**

| <b>ONLY ABSTRACT/POSTER PRESENTATION</b> |                        |             |                                                                                                                                            |
|------------------------------------------|------------------------|-------------|--------------------------------------------------------------------------------------------------------------------------------------------|
|                                          | <b>AUTHOR</b>          | <b>YEAR</b> | <b>Title</b>                                                                                                                               |
| 1                                        | Ahmed, O.              | 2013        | The prevalence of dental disease in inflammatory bowel disease - American Journal of Gastroenterology                                      |
| 2                                        | Barreiro-de Acosta, M. | 2016        | Oral manifestations in inflammatory bowel disease patients under anti-tumour necrosis factor treatment                                     |
| 3                                        | Kelsen, J.             | 2013        | Pediatric crohn's disease intrinsic associations with the subgingival microbiota revealed by a prospective longitudinal cohort study       |
| 4                                        | Kim, J. S.             | 2019        | Increased risk of ulcerative colitis in patients with periodontitis: a nationwide populationbased study                                    |
| 5                                        | Koutsochristou, V.     | 2014        | Profiles of dental caries and periodontal disease in individuals with or without inflammatory bowel disease (IBD)                          |
| 6                                        | Piatek, D              | 2018        | Selected cytokines in periodontitis in patients with Crohn's disease-preliminary results from polibd study                                 |
| 7                                        | Piatek D               | 2018        | The impact of Crohn's disease on periodontal status-preliminary results from polibd study                                                  |
| 8                                        | Docktor, M             | 2010        | The oral microbiome in children with inflammatory bowel disease                                                                            |
| 9                                        | Vandyke, T. E.         | 1984        | Immunological and microbiologic characterization of periodontal-disease in crohns-disease patients                                         |
| <b>REVIEW</b>                            |                        |             |                                                                                                                                            |
| 1                                        | Keskin, M.             | 2015        | Two Cheers for Crohn's Disease and Periodontitis: Beta-Defensin-2 as an Actionable Target to Intervene on Two Clinically Distinct Diseases |
| 2                                        | Mantegazza, C.         | 2016        | Oral manifestations of gastrointestinal diseases in children. Part 1: General introduction                                                 |
| 3                                        | Mantegazza, C.         | 2016        | Oral manifestations of gastrointestinal diseases in children. Part 3: Ulcerative colitis and gastro-oesophageal reflux disease             |

|   |               |      |                                                                                                       |
|---|---------------|------|-------------------------------------------------------------------------------------------------------|
| 4 | Niculescu, Z. | 2010 | Oral manifestations of gastrointestinal diseases: An interdisciplinary approach                       |
| 5 | Taylor, V. E  | 1975 | Oral manifestations of Crohn's disease without demonstrable gastrointestinal lesions                  |
| 6 | Topbas, A.    | 2018 | Early Detection of Crohn's Disease on the Basis of Oral Manifestations in a Case with Marfan Syndrome |

#### NO IMMUNOLOGICAL ANYLISIS/PATIENTS WITH ONLY ONE DISASE

|    |                  |      |                                                                                                                                                      |
|----|------------------|------|------------------------------------------------------------------------------------------------------------------------------------------------------|
| 1  | Brito F.         | 2008 | Prevalence of periodontitis and DMFT index in patients with Crohn's disease and ulcerative colitis                                                   |
| 2  | Brito F          | 2013 | Subgingival microflora in inflammatory bowel disease patients with untreated periodontitis                                                           |
| 3  | Chi YC.          | 2013 | Increased risk of periodontitis among patients with Crohn's disease: a population-based matched-cohort study                                         |
| 4  | Docktor, M. J.   | 2012 | Alterations in diversity of the oral microbiome in pediatric inflammatory bowel disease                                                              |
| 5  | Flemmig, T. F.   | 1991 | Prevalence and severity of periodontal disease in patients with inflammatory bowel disease                                                           |
| 6  | Fumery, O.       | 2017 | Patients with inflammatory bowel disease have an increase risk of periodontitis correlated with disease activity                                     |
| 7  | Georgijewska, A. | 2011 | Periodontal status evaluation in patients with diagnosed IBD: Crohn's disease and ulcerative colitis                                                 |
| 8  | Harty, S.        | 2005 | A prospective study of the oral manifestations of Crohn's disease                                                                                    |
| 9  | Jones, J. V.     | 1986 | Phenotypic characteristics of motile, nonspore-forming, gram-negative anaerobes from periodontal lesions of patients with inflammatory bowel-disease |
| 10 | Kelsen, J.       | 2012 | The subgingival oral microbiome in pediatric patients with crohn's disease                                                                           |

|    |                    |      |                                                                                                                                   |
|----|--------------------|------|-----------------------------------------------------------------------------------------------------------------------------------|
| 11 | Kelsen, J.         | 2015 | Alterations of the Subgingival Microbiota in Pediatric Crohn's Disease Studied Longitudinally in Discovery and Validation Cohorts |
| 12 | Kelsen, J.         | 2013 | Longitudinal characterization of the subgingival microbiota in pediatric crohn's disease                                          |
| 13 | Klaniecka, B.      | 2016 | Oral Cavity Condition and Selected Salivary Parameters in Children and Adolescents Suffering from Inflammatory Bowel Diseases     |
| 14 | Koutsochristou, V. | 2015 | Dental caries and periodontal disease in children and adolescents with inflammatory bowel disease: A case-control study           |
| 15 | Kumar, K. M.       | 2018 | Association of oral manifestations in ulcerative colitis: A pilot study                                                           |
| 16 | Laws, A. J.        | 1979 | Interdental colitis: the entity and its management                                                                                |
| 17 | Lazzerini, M.      | 2015 | Orofacial granulomatosis in children: Think about Crohn's disease                                                                 |
| 18 | Lee, A. M.         | 2013 | Intestinal failure and home parenteral nutrition: Implications for oral health and dental care                                    |
| 19 | Lin, C. Y.         | 2018 | Increased risk of ulcerative colitis in patients with periodontal disease: A nationwide population-based cohort study             |
| 20 | Lovelina, F. D.    | 2016 | Oral health status of ulcerative colitis patients: A comparative study                                                            |
| 21 | Malathi, K.        | 2017 | Gingival enlargement unveiling Crohn's disease - A report of a rarefied case                                                      |
| 22 | Mergulhao, P.      | 2005 | Gingival hyperplasia as a first manifestation of Crohn's disease                                                                  |
| 23 | Meurman, J. H.     | 1994 | Gingival and dental status, salivary acidogenic bacteria, and yeast counts of patients with active or inactive Crohn's disease    |
| 24 | Misra, S.          | 1996 | Orofacial lesions in Crohn's disease                                                                                              |

|    |                     |      |                                                                                                                                         |
|----|---------------------|------|-----------------------------------------------------------------------------------------------------------------------------------------|
| 25 | Nagpal, S.          | 2012 | Periodontal disease and anemias associated with Crohn's disease. A case report                                                          |
| 26 | Nemetz, A           | 2001 | Allelic variation at the interleukin 1 $\beta$ gene is associated with decreased bone mass in patients with inflammatory bowel diseases |
| 27 | Nishizawa, T.       | 2019 | Clinical features of very early-onset inflammatory bowel disease in Japan, a single centre pilot study                                  |
| 28 | Ojha, J.            | 2007 | Gingival involvement in Crohn disease                                                                                                   |
| 29 | Oostlander, A. E.   | 2012 | T cell-mediated increased osteoclast formation from peripheral blood as a mechanism for crohn's disease-associated bone loss            |
| 30 | Plauth, M.          | 1991 | Oral manifestations of Crohn's disease. An analysis of 79 cases                                                                         |
| 31 | Pujol Muncunill, G. | 2019 | Oral and periodontal manifestations in Paediatric Inflammatory Bowel Disease                                                            |
| 32 | Rio Rouco, P.       | 2015 | Oral and periodontal manifestations in Paediatric Inflammatory Bowel Disease                                                            |
| 33 | Schiller, K. F.     | 1971 | Crohn's disease of the mouth and lips                                                                                                   |
| 34 | Schuler, D.         | 1971 | [Ulcerative hyperplastic gingivitis in one member of a pair of monozygotic twins]                                                       |
| 35 | Schulz, S.          | 2014 | Tumor necrosis factor- $\alpha$ and oral inflammation in patients with Crohn disease                                                    |
| 36 | Sigus, B. W.        | 2004 | Periodontitis as manifestation of Crohn's disease in primary dentition: A case report                                                   |
| 37 | Simpson, H. E       | 1974 | Oral manifestations of Crohn's disease                                                                                                  |
| 38 | Sternthal, M. B.    | 2008 | Adverse events associated with the use of cyclosporine in patients with inflammatory bowel disease                                      |
| 39 | Ursomanno, B. L.    | 2019 | Treatment of Crohn's disease and Ulcerative colitis with proton pump inhibitors: effect on bone loss at dental implants                 |

|    |                    |      |                                                                                                                                       |
|----|--------------------|------|---------------------------------------------------------------------------------------------------------------------------------------|
| 40 | Vavricka, S. R.    | 2013 | Periodontitis and Gingivitis in Inflammatory Bowel Disease: A Case-Control Study                                                      |
| 41 | Vinesh, E.         | 2016 | A Clinicopathologic Study of Oral Changes in Gastroesophageal Reflux Disease, Gastritis, and Ulcerative Colitis                       |
| 42 | Vonaesch, P.       | 2018 | Stunted childhood growth is associated with decompartmentalization of the gastrointestinal tract and overgrowth of oropharyngeal taxa |
| 43 | Ward, C. S.        | 1985 | Crohn's disease limited to the mouth and anus                                                                                         |
| 44 | Wiesenfeld, D      | 1985 | Oro-facial granulomatosis--a clinical and pathological analysis                                                                       |
| 45 | Wray, D.           | 1998 | Gastrointestinal and granulomatous diseases                                                                                           |
| 46 | Yerke, L           | 2019 | Relationship between proton pump inhibitors and periodontal disease: Treatment considerations for IBD patients                        |
| 47 | Yin, W.            | 2017 | Inverse Association Between Poor Oral Health and Inflammatory Bowel Diseases                                                          |
| 48 | Yu, H. C.          | 2018 | Inflammatory bowel disease as a risk factor for periodontitis under Taiwanese National Health Insurance Research database             |
| 49 | Zhang, L.          | 2020 | Increased risks of dental caries and periodontal disease in Chinese patients with inflammatory bowel disease                          |
| 50 | Cotti, E.          | 2018 | Healing of Apical Periodontitis in Patients with Inflammatory Bowel Diseases and under Anti-tumor Necrosis Factor Alpha Therapy       |
| 51 | de Vries, S. A. G. | 2018 | Salivary Function and Oral Health Problems in Crohn's Disease Patients                                                                |
| 52 | Francis, D. L.     | 2018 | Oral health status of ulcerative colitis patients: A comparative study                                                                |
| 53 | Gemmell, M. R.     | 2017 | Defining genome diversity of campylobacter concisus between oral, faecal and colonic biopsy isolates                                  |

|    |                |      |                                                                                                                              |
|----|----------------|------|------------------------------------------------------------------------------------------------------------------------------|
| 54 | Grošelj, D.    | 2008 | Prediction of clinical response to anti-TNF treatment by oral parameters in Crohn's disease                                  |
| 55 | Holmes, A.     | 1985 | Gingival swelling as the presenting feature of Crohn's disease in children                                                   |
| 56 | Hujoel, P. P.  | 2016 | Dental Morbidities, Smoking, Oral Hygiene, and Inflammatory Bowel Diseases                                                   |
| 57 | Johannsen, A.  | 2015 | Consumption of Dental Treatment in Patients with Inflammatory Bowel Disease, a Register Study                                |
| 58 | Kang, E. A.    | 2019 | Increased risk of Ulcerative colitis in patients with periodontitis: a nationwide population-based study                     |
| 59 | Kang, E. A.    | 2020 | Periodontitis combined with smoking increases risk of the ulcerative colitis: A national cohort study                        |
| 60 | Kato, I.       | 2020 | History of inflammatory bowel disease and self-reported oral health: Women's health initiative observational study           |
| 61 | Xu, A A        | 2020 | Oral Health and the Altered Colonic Mucosa-Associated Gut Microbiota                                                         |
| 62 | Said, H S      | 2014 | Dysbiosis of Salivary Microbiota in Inflammatory Bowel Disease and Its association with Oral Immunological Biomarkers        |
| 63 | Stein, J. M.   | 2010 | Clinical periodontal and microbiologic parameters in patients with crohn's disease with consideration of the CARD15 genotype |
| 64 | Simpson, H. E. | 1976 | Oral manifestations of Crohn's disease                                                                                       |
